# Supplementary material for: Multidimensional OH local mode calculations for OH−(H2O)3—Importance of intermode anharmonicity
Source: Royal Society of Chemistry journal article supplement (doi:10.1039/c2cp42501g), 2012-10-23
Supplement: c2cp42501g.pdf [file c2cp42501g.pdf]

## Electronic Supplementary Information

# Multidimensional OH local mode calculations for $\text{OH}^-(\text{H}_2\text{O})_3$

~ Importance of intermode anharmonicity ~

Masato Morita and Kaito Takahashi\*

Institute of Atomic and Molecular Sciences, Academia Sinica PO Box 23-166 Taipei 10617 Taiwan R.O.C.

E-mail: kt@gate.sinica.edu.tw

## Contents

### 1. Additional Calculation Results

- 1-1. IHB OH and  $\text{O}\cdots\text{O}$  coupling by LM-2D(KC) and LM-2D models (Table S1-S2)
- 1-2. Inter mode coupling effect for OH stretching vibrations (Table S3 and Figure S1-S2)
- 1-3. Temperature dependence of OH vibrational spectra (Figures S3-S6)
- 1-4. Comparison of the vibrational spectra with and without counterpoise correction (Table S4)
- 1-5. Energetics with counterpoise correction for  $\text{OH}^-(\text{H}_2\text{O})_3\cdot\text{Ar}$  (Table S5)

### 2. Optimized geometry (Cartesian coordinate)

- 2-1.  $\text{OH}^-(\text{H}_2\text{O})_3$
- 2-2.  $\text{OH}^-(\text{H}_2\text{O})_3\cdot\text{Ar}$

# 1. Additional Calculation Results

As described in the text, all the calculation for the electronic structure calculations including dipole moment values were performed with Gaussian 09 program with MP2/6-311++G(3df,3pd) except for Figure S2.

## 1-1. IHB OH and O...O coupling by LM-2D(KC) and LM-2D models

We obtained the IHB-OH and O-O stretching combination band with 2-dimensional PES and DMF. LM-2D(KC) includes the kinetic energy coupling term in Eq.(1). LM-2D does not include kinetic energy coupling term.

LM-2D(KC)

Table S1 Peak positions and intensities by LM-2D(KC) for IHB OH and O...O stretching vibrations

| frequency( $\text{cm}^{-1}$ ) | Intensity( $\text{km/mol}$ ) | ( $\nu_{\text{OH}}, \nu_{\text{OO}}$ ) |
|-------------------------------|------------------------------|----------------------------------------|
| 330                           | 34.5                         | (0,1)                                  |
| 648                           | 2.7                          | (0,2)                                  |
| 955                           | 0.2                          | (0,3)                                  |
| 1251                          | 0.0                          | (0,4)                                  |
| 1534                          | 0.0                          | (0,5)                                  |
| 1807                          | 0.0                          | (0,6)                                  |
| 2068                          | 0.1                          | (0,7)                                  |
| 2317                          | 2.9                          | (0,8)                                  |
| 2358                          | 1785.8                       | (1,0)                                  |
| 2555                          | 0.1                          | (0,9)                                  |
| 2782                          | 42.4                         | (0,10)                                 |
| 2787                          | 155.9                        | (1,1)                                  |
| 3003                          | 0.0                          | (0,11)                                 |
| 3188                          | 13.1                         | (1,2)                                  |
| 3216                          | 0.0                          | (0,12)                                 |
| 3422                          | 0.0                          | (0,13)                                 |
| 3567                          | 0.1                          | (1,3)                                  |
| 3624                          | 0.0                          | (0,14)                                 |
| 3821                          | 0.0                          | (0,15)                                 |

LM-2D (No inclusion of the kinetic energy coupling term)

Table S2 Peak positions and intensities by LM-2D for IHB OH  
and O...O stretching vibrations

| frequency( $\text{cm}^{-1}$ ) | Intensity( $\text{km/mol}$ ) | ( $\nu_{\text{OH}}, \nu_{\text{OO}}$ ) |
|-------------------------------|------------------------------|----------------------------------------|
| 338                           | 34.2                         | (0,1)                                  |
| 663                           | 2.4                          | (0,2)                                  |
| 976                           | 0.1                          | (0,3)                                  |
| 1277                          | 0.0                          | (0,4)                                  |
| 1566                          | 0.0                          | (0,5)                                  |
| 1842                          | 0.1                          | (0,6)                                  |
| 2106                          | 0.1                          | (0,7)                                  |
| 2344                          | 1900.3                       | (1,0)                                  |
| 2358                          | 11.2                         | (0,8)                                  |
| 2599                          | 0.0                          | (0,9)                                  |
| 2785                          | 144.6                        | (1,1)                                  |
| 2829                          | 0.1                          | (0,10)                                 |
| 3051                          | 0.0                          | (0,11)                                 |
| 3197                          | 12.1                         | (1,2)                                  |
| 3267                          | 0.0                          | (0,12)                                 |
| 3476                          | 0.0                          | (0,13)                                 |
| 3584                          | 0.2                          | (1,3)                                  |
| 3680                          | 0.0                          | (0,14)                                 |
| 3879                          | 0.0                          | (0,15)                                 |

## 1-2. Inter mode coupling effect for OH stretching vibrations

We show the dependence of the peak position on the treatment of inter mode coupling effect. As described in the text, LM is Local mode model calculation, which does not include inter mode coupling, LM-HC includes the inter mode coupling only using the harmonic term, LM-3D includes the full inter mode coupling effects.

Table S3. Peak positions by LM, LM-HC and LM-3D

| Conformer I     |                               |                               |                               | Conformer II    |                               |                               |                               |
|-----------------|-------------------------------|-------------------------------|-------------------------------|-----------------|-------------------------------|-------------------------------|-------------------------------|
| Stretching Mode | LM                            | LM-HC                         | LM-3D                         | Stretching Mode | LM                            | LM-HC                         | LM-3D                         |
|                 | Frequency (cm <sup>-1</sup> ) | Frequency (cm <sup>-1</sup> ) | Frequency (cm <sup>-1</sup> ) |                 | Frequency (cm <sup>-1</sup> ) | Frequency (cm <sup>-1</sup> ) | Frequency (cm <sup>-1</sup> ) |
| IHB OH          | 2423                          | 2418                          | 2419                          | IHB OH          | 2281                          | 2292                          | 2302                          |
|                 | 2423                          | 2418                          | 2419                          |                 | 2347                          | 2377                          | 2450                          |
|                 | 2423                          | 2494                          | 2655                          |                 | 2721                          | 2740                          | 2818                          |
| free OH         | 3773                          | 3773                          | 3773                          | free OH         | 3745                          | 3745                          | 3745                          |
|                 | 3773                          | 3773                          | 3773                          |                 | 3774                          | 3774                          | 3774                          |
|                 | 3773                          | 3773                          | 3773                          |                 | 3777                          | 3777                          | 3777                          |
| Conformer III   |                               |                               |                               | Conformer IV    |                               |                               |                               |
| Stretching Mode | LM                            | LM-3D                         | LM-3D                         | Stretching Mode | LM                            | LM-3D                         | LM-3D                         |
|                 | Frequency (cm <sup>-1</sup> ) | Frequency (cm <sup>-1</sup> ) | Frequency (cm <sup>-1</sup> ) |                 | Frequency (cm <sup>-1</sup> ) | Frequency (cm <sup>-1</sup> ) | Frequency (cm <sup>-1</sup> ) |
| IHB OH          | 2271                          | 2290                          | 2314                          | IHB OH          | 2682                          | 2675                          | 2666                          |
|                 | 2531                          | 2523                          | 2533                          |                 | 2682                          | 2675                          | 2666                          |
|                 | 2531                          | 2587                          | 2718                          |                 | 2682                          | 2733                          | 2876                          |
| free OH         | 3765                          | 3765                          | 3765                          | free OH         | 3731                          | 3728                          | 3727                          |
|                 | 3765                          | 3765                          | 3765                          |                 | 3731                          | 3733                          | 3732                          |
|                 | 3769                          | 3769                          | 3769                          |                 | 3731                          | 3733                          | 3732                          |

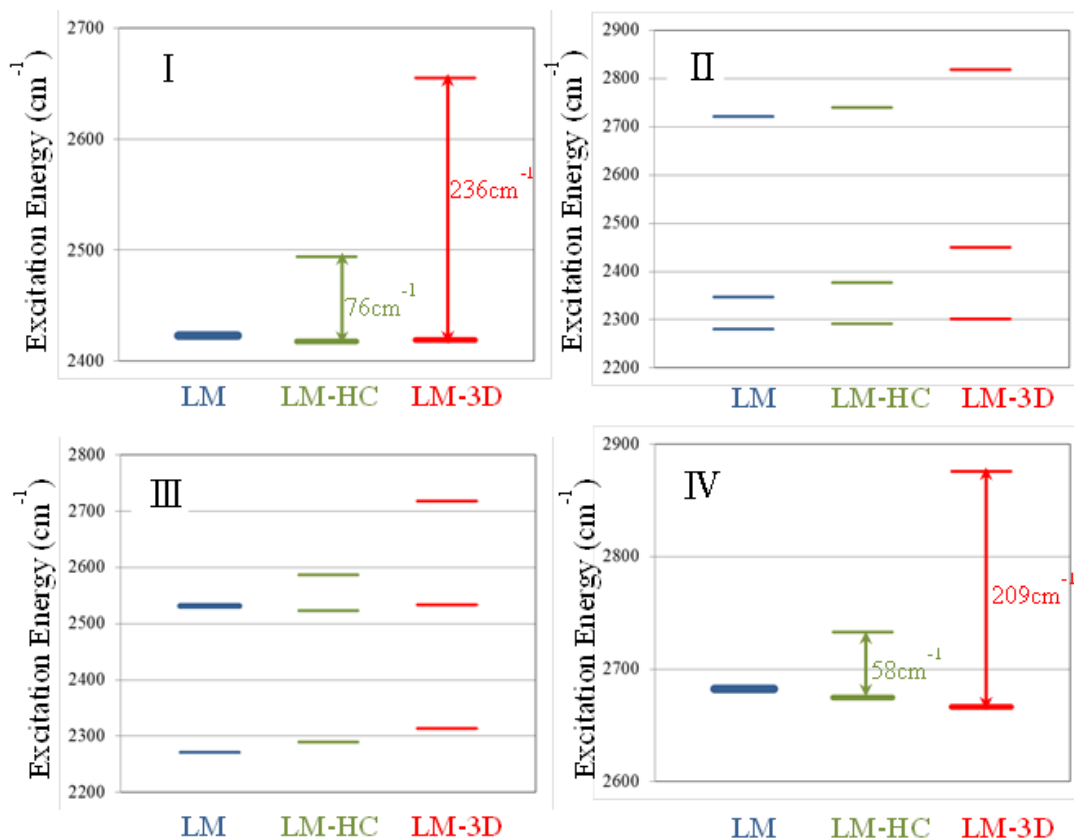

Figure S1. Dependence of inter mode coupling effect treatment for the peak positions of IHB OH stretching vibrations.

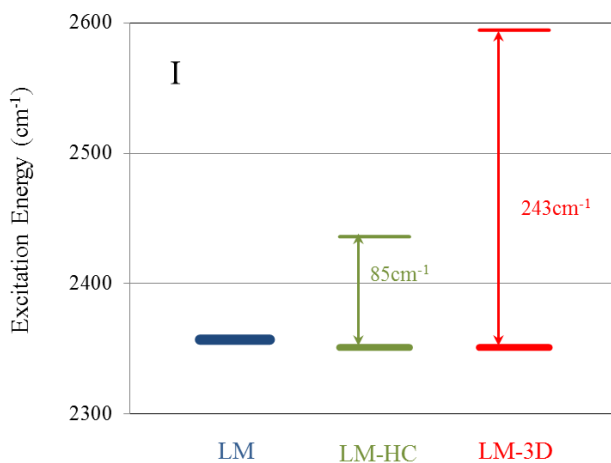

Figure S2. Dependence of inter mode coupling effect treatment for the peak positions of IHB OH stretching vibrations for Conformer I using B3LYP/6-31+G(d,p).

### 1-3. Temperature dependence of OH vibrational spectra

In the text, we used the temperature of 50K in the calculation of the inhomogeneous linewidths. Here we show the simulated spectra with using other temperatures (100K and 150K). As shown in Eq.(5) of the text, the value of the inhomogeneous linewidth is generally becomes large as the temperature increases.

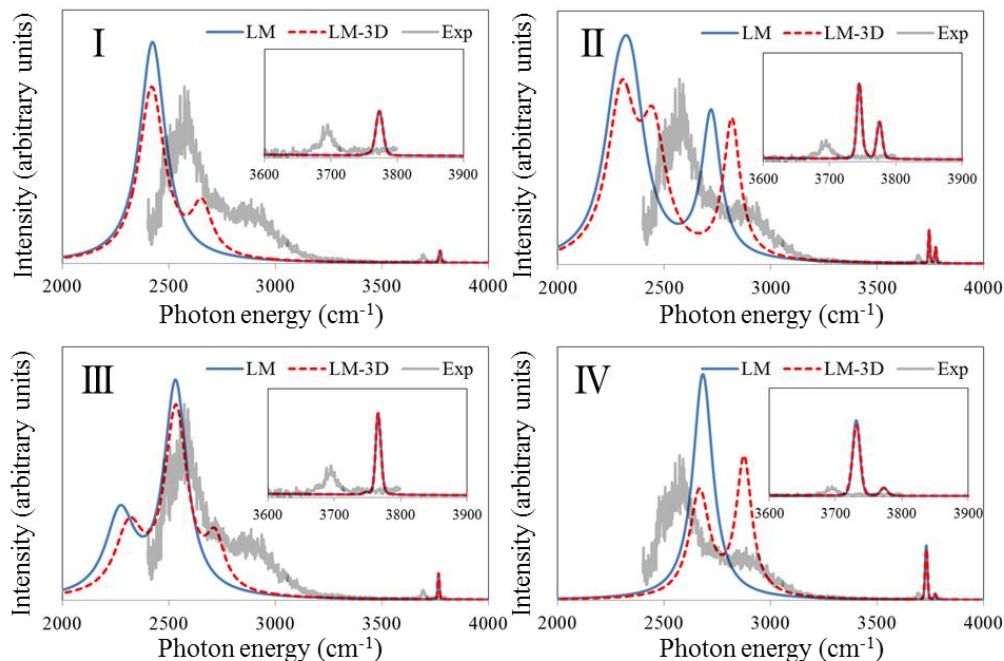

Figure S3. Vibrational spectrum for each conformer. (100K)

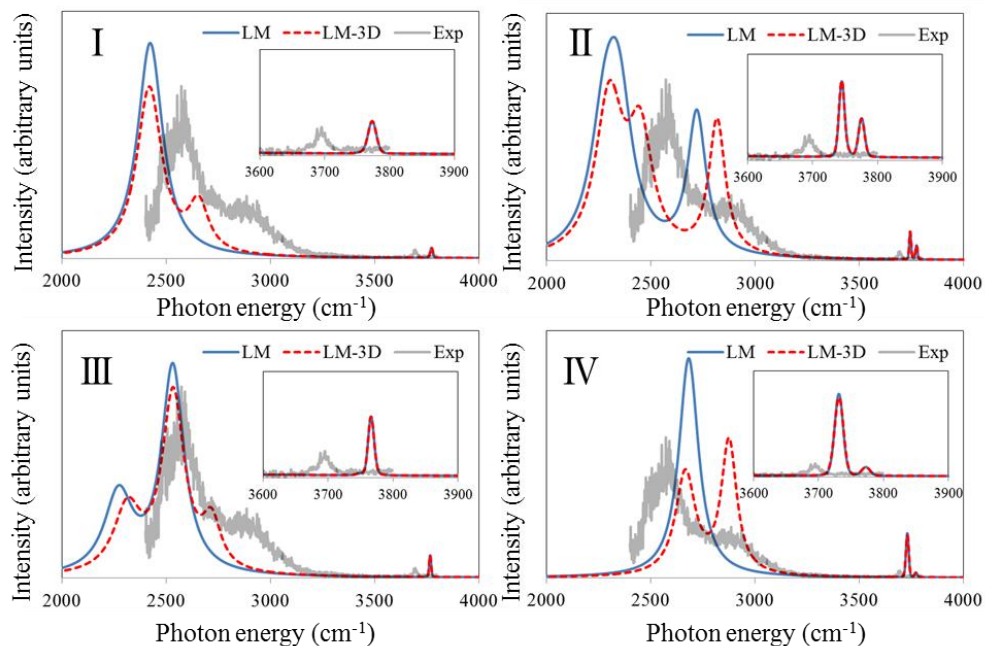

Figure S4. Vibrational spectrum for each conformer. (150K)

In the text, we considered the simple Boltzmann distribution using the argon attached structures to calculate the existence ratio of 4 conformers at the temperature of 50K. Here we calculate the existence ratio of conformers using other temperatures (100K and 150K), and obtain the vibrational spectra using this ratio.

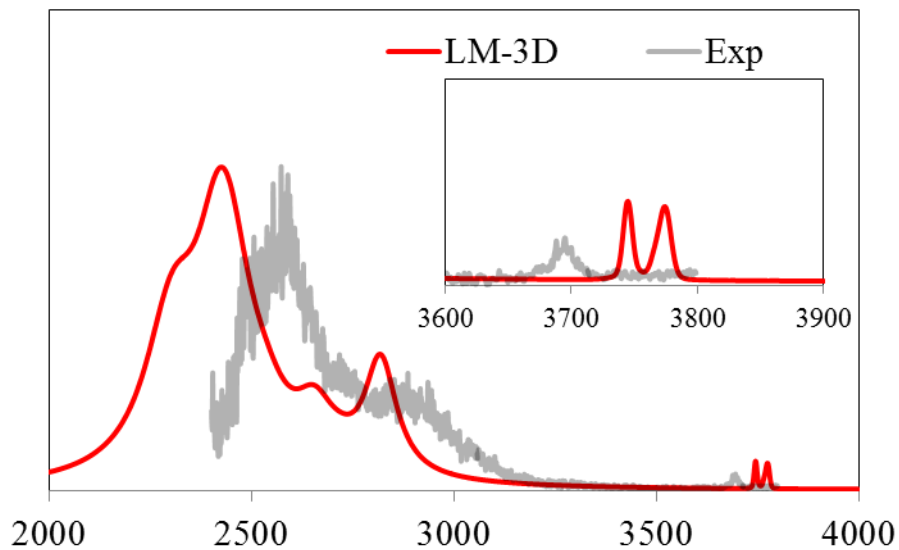

Figure S5. Vibrational spectrum (100K)

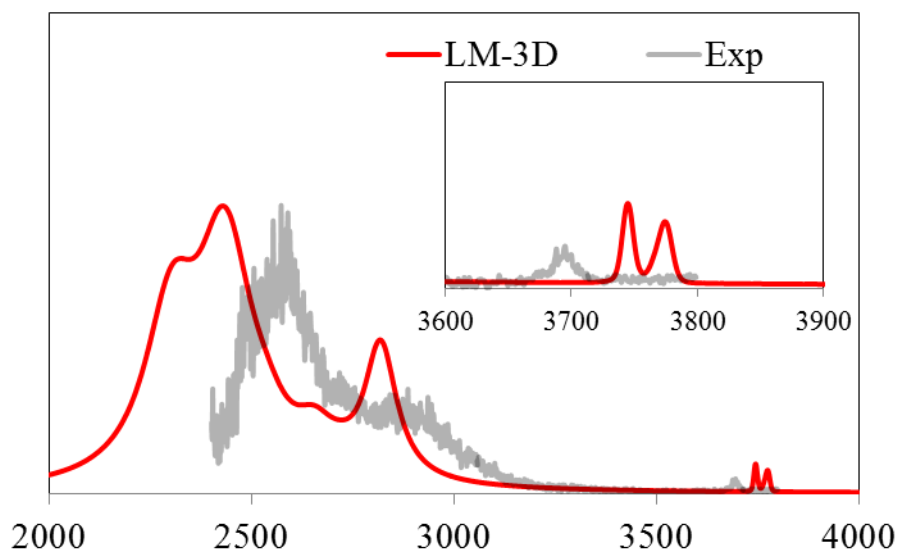

Figure S6. Vibrational spectrum (150K)

## 1-4. Comparison of the vibrational spectra with and without counterpoise correction

As described in the text, we obtained the counterpoise corrected potential energy surface/curve for the calculation of the vibrational spectrum (Argon attached/CP). The cartesian coordinate of the optimized structure with counterpoise correction is given in the end of ESI. We defined the 4 fragments as one OH<sup>-</sup> and three water monomers and one argon atom for the counterpoise correction.

Table S4. LM-3D calculation for Conformer I -1

| Stretching Mode              | Argon attached                   |                       | Argon attached/CP                |                       |
|------------------------------|----------------------------------|-----------------------|----------------------------------|-----------------------|
|                              | Frequency<br>(cm <sup>-1</sup> ) | Intensity<br>(km/mol) | Frequency<br>(cm <sup>-1</sup> ) | Intensity<br>(km/mol) |
| IHB OH                       | 2381                             | 2644                  | 2480                             | 2467                  |
|                              | 2381                             | 2644                  | 2480                             | 2468                  |
|                              | 2619                             | 583                   | 2693                             | 636                   |
| free OH                      | 3775                             | 3.3                   | 3779                             | 6.9                   |
|                              | 3775                             | 5.9                   | 3779                             | 6.9                   |
|                              | 3775                             | 5.8                   | 3779                             | 3.9                   |
| OH <sup>-</sup> <sup>a</sup> | 3740                             | 0.18                  | 3745                             | 0.52                  |

<sup>a</sup> OH<sup>-</sup> is calculated with LM.



## 1-5. Energetics with counterpoise correction for OH(H<sub>2</sub>O)<sub>3</sub>·Ar (Table S5)

Table S5. Relative energies (kcal/mol) for OH(H<sub>2</sub>O)<sub>3</sub>·Ar with MP2/6-311++G(3df,3pd)

| Conformer |   | Electronic Energy |              | Electronic Energy +ZPE <sup>b</sup> | Free Energy (50K) <sup>b</sup> |
|-----------|---|-------------------|--------------|-------------------------------------|--------------------------------|
|           |   | a posteriori      | a priori     |                                     |                                |
| I         | 1 | 0.204             | 0.211        | <u>0.000</u>                        | <u>0.000</u>                   |
| II        | 1 | 0.171             | 0.176        | 0.233                               | 0.372                          |
|           | 2 | 0.203             | <i>a</i>     | <i>a</i>                            | <i>a</i>                       |
|           | 3 | 0.175             | <i>a</i>     | <i>a</i>                            | <i>a</i>                       |
|           | 4 | 0.183             | 0.190        | 0.248                               | 0.237                          |
| III       | 1 | 0.347             | 0.344        | 0.475                               | 0.579                          |
|           | 2 | 0.656             | 0.663        | 0.789                               | 0.916                          |
| IV        | 1 | 0.308             | 0.292        | 1.236                               | 1.559                          |
|           | 2 | <u>0.000</u>      | <u>0.000</u> | 0.941                               | 1.170                          |

<sup>a</sup>We could not find the optimized structure.

<sup>b</sup>"Electronic Energy +ZPE" and "Free Energy" are calculated with a priori treatment (counterpoise optimization).

## 2. Optimized geometry (Cartesian coordinate)

### 2-1. OH(H<sub>2</sub>O)<sub>3</sub>

[ Conformer I (C3) ]

|   |           |           |           |
|---|-----------|-----------|-----------|
| O | -2.343748 | -0.176497 | -0.284685 |
| O | 1.324725  | -1.941497 | -0.284685 |
| O | 1.019024  | 2.117994  | -0.284685 |

|   |           |           |           |
|---|-----------|-----------|-----------|
| O | 0.000000  | 0.000000  | 0.854585  |
| H | -1.468286 | -0.081040 | 0.208469  |
| H | -2.181309 | -0.956538 | -0.816924 |
| H | 0.804325  | -1.231053 | 0.208469  |
| H | 1.919040  | -1.410800 | -0.816924 |
| H | 0.663960  | 1.312093  | 0.208469  |
| H | 0.262268  | 2.367337  | -0.816924 |
| H | 0.000000  | 0.000000  | 1.813478  |

[ Conformer II ]

|   |           |           |           |
|---|-----------|-----------|-----------|
| O | -2.354953 | -1.130973 | -0.442096 |
| O | 1.997697  | -0.619204 | -0.968042 |
| O | 0.385413  | 2.114717  | 0.052857  |
| O | -0.103607 | -0.370555 | 0.625925  |
| H | -1.505096 | -0.833711 | 0.019744  |
| H | -2.012177 | -1.617940 | -1.192291 |
| H | 1.223936  | -0.651954 | -0.336766 |
| H | 2.059296  | 0.329079  | -1.105484 |
| H | 0.192754  | 1.164179  | 0.347662  |
| H | -0.398175 | 2.328797  | -0.455145 |
| H | 0.005130  | -0.621490 | 1.545103  |

[ Conformer III ]

|   |           |           |           |
|---|-----------|-----------|-----------|
| O | -1.897084 | -1.576048 | -0.741185 |
| O | 1.551365  | -0.766516 | -0.939550 |
| O | 0.711787  | 2.435949  | 0.334950  |
| O | -0.353839 | 0.049706  | 0.635521  |
| H | -1.383992 | -0.921861 | -0.175203 |

|   |           |           |           |
|---|-----------|-----------|-----------|
| H | -1.181309 | -2.082057 | -1.129512 |
| H | 0.846283  | -0.488663 | -0.266422 |
| H | 1.236853  | -0.346956 | -1.741791 |
| H | 0.233326  | 1.565326  | 0.491939  |
| H | 1.553437  | 2.123552  | -0.001520 |
| H | -0.292030 | -0.235678 | 1.549581  |

[ Conformer IV (C3) ]

|   |           |           |           |
|---|-----------|-----------|-----------|
| O | -0.123210 | 1.896870  | -0.450405 |
| O | -1.581133 | -1.055139 | -0.450405 |
| O | 1.704343  | -0.841732 | -0.450405 |
| O | 0.000000  | 0.000000  | 1.352249  |
| H | -0.036682 | 1.309832  | 0.355026  |
| H | -0.803449 | 1.416020  | -0.929485 |
| H | -1.116007 | -0.686684 | 0.355026  |
| H | -0.824585 | -1.403817 | -0.929485 |
| H | 1.152689  | -0.623149 | 0.355026  |
| H | 1.628034  | -0.012203 | -0.929485 |
| H | 0.000000  | 0.000000  | 2.309567  |

## 2-2. $\text{OH}^-(\text{H}_2\text{O})_3 \cdot \text{Ar}$

[ Conformer I-1 ]

|   |           |           |          |
|---|-----------|-----------|----------|
| O | -1.531756 | 1.947508  | 0.986191 |
| O | -0.920714 | -2.300294 | 0.986191 |
| O | 2.452470  | 0.352786  | 0.986191 |
| O | 0.000000  | 0.000000  | 1.824963 |
| H | -0.925780 | 1.218006  | 1.335355 |

|    |           |           |           |
|----|-----------|-----------|-----------|
| H  | -2.212781 | 1.443959  | 0.538663  |
| H  | -0.591934 | -1.410752 | 1.335355  |
| H  | -0.144115 | -2.638304 | 0.538663  |
| H  | 1.517714  | 0.192746  | 1.335355  |
| H  | 2.356896  | 1.194345  | 0.538663  |
| H  | 0.000000  | 0.000000  | 2.785083  |
| Ar | 0.000000  | 0.000000  | -1.636893 |

[ Conformer II-1 ]

|    |           |           |           |
|----|-----------|-----------|-----------|
| O  | -2.741797 | -0.024503 | 0.685975  |
| O  | 1.586048  | -1.674780 | 0.909837  |
| O  | 1.490482  | 1.682427  | 1.037591  |
| O  | -0.340946 | -0.036432 | 1.709496  |
| H  | -1.816436 | -0.002078 | 1.096256  |
| H  | -2.742851 | -0.870056 | 0.236313  |
| H  | 0.802548  | -1.150952 | 1.244340  |
| H  | 2.186418  | -0.959729 | 0.686667  |
| H  | 0.762560  | 1.043141  | 1.339314  |
| H  | 1.049563  | 2.191506  | 0.356529  |
| H  | -0.440988 | -0.060811 | 2.664068  |
| Ar | -0.115845 | 0.021632  | -1.759873 |

[ Conformer II-2 ]

|   |           |           |           |
|---|-----------|-----------|-----------|
| O | -0.283956 | -2.458720 | -0.455562 |
| O | -0.640602 | 1.958873  | -0.465979 |
| O | -3.520488 | 0.364612  | 0.072584  |
| O | -1.115041 | -0.320514 | 0.782671  |
| H | -0.617735 | -1.656661 | 0.062613  |

|    |           |           |           |
|----|-----------|-----------|-----------|
| H  | 0.323284  | -2.056821 | -1.077728 |
| H  | -0.708036 | 1.103445  | 0.048280  |
| H  | -1.568137 | 2.107206  | -0.665204 |
| H  | -2.608767 | 0.083810  | 0.413615  |
| H  | -3.717652 | -0.323605 | -0.564042 |
| H  | -0.959964 | -0.341876 | 1.728991  |
| Ar | 2.290344  | 0.335605  | -0.172858 |

[ Conformer II-3 ]

|    |           |           |           |
|----|-----------|-----------|-----------|
| O  | 0.293420  | -2.541122 | -1.795750 |
| O  | 1.252410  | 1.717342  | -2.310228 |
| O  | -1.965354 | 1.011042  | -2.435591 |
| O  | -0.137704 | -0.103623 | -0.977366 |
| H  | 0.101141  | -1.615806 | -1.435931 |
| H  | 1.096172  | -2.395583 | -2.297600 |
| H  | 0.842412  | 1.017323  | -1.728444 |
| H  | 0.476602  | 1.997610  | -2.802107 |
| H  | -1.297581 | 0.579104  | -1.805038 |
| H  | -2.187988 | 0.284685  | -3.019574 |
| H  | -0.223223 | -0.013505 | -0.026459 |
| Ar | -1.222413 | 3.237192  | -0.046424 |

[ Conformer II-4 ]

|   |           |           |           |
|---|-----------|-----------|-----------|
| O | 0.846635  | -0.950528 | -0.977793 |
| O | 1.223630  | 3.401261  | -0.044454 |
| O | -1.851327 | 2.075666  | -0.062384 |
| O | 0.391346  | 0.992127  | 0.683723  |
| H | 0.663035  | -0.224468 | -0.294731 |

|    |           |           |           |
|----|-----------|-----------|-----------|
| H  | 1.569493  | -0.573117 | -1.480396 |
| H  | 1.028360  | 2.477223  | 0.280287  |
| H  | 0.339109  | 3.682157  | -0.290445 |
| H  | -1.010919 | 1.638614  | 0.294306  |
| H  | -2.030682 | 1.553671  | -0.845681 |
| H  | 0.471124  | 0.758299  | 1.610385  |
| Ar | -2.036120 | -1.641421 | 0.623956  |

[ Conformer III-1 ]

|    |           |           |           |
|----|-----------|-----------|-----------|
| O  | -1.731528 | 0.910106  | -2.505859 |
| O  | -0.423740 | -1.217370 | 0.015297  |
| O  | -1.781693 | 0.898720  | 2.519902  |
| O  | -2.415439 | 0.464584  | -0.000537 |
| H  | -2.044984 | 0.809484  | -1.556004 |
| H  | -1.176313 | 0.133926  | -2.599046 |
| H  | -1.242317 | -0.620222 | 0.008578  |
| H  | 0.292190  | -0.580439 | 0.024088  |
| H  | -2.076097 | 0.802383  | 1.563520  |
| H  | -1.228560 | 0.122013  | 2.620750  |
| H  | -3.282543 | 0.052426  | -0.010114 |
| Ar | 0.273245  | 2.471664  | 0.030842  |

[ Conformer III-2 ]

|   |           |           |           |
|---|-----------|-----------|-----------|
| O | 2.419824  | -0.934817 | -2.162717 |
| O | -0.025458 | 1.687884  | -1.251546 |
| O | -2.406012 | -0.627160 | -1.309280 |
| O | 0.189774  | -0.857369 | -0.797481 |
| H | 1.555691  | -0.976121 | -1.640892 |

|    |           |           |           |
|----|-----------|-----------|-----------|
| H  | 2.733832  | -0.054970 | -1.950069 |
| H  | 0.080777  | 0.710257  | -0.998562 |
| H  | 0.202189  | 1.678328  | -2.182666 |
| H  | -1.450766 | -0.842286 | -1.110847 |
| H  | -2.351101 | 0.328415  | -1.382766 |
| H  | 0.356617  | -1.120869 | 0.110013  |
| Ar | -1.337679 | 1.198604  | 1.784338  |

[ Conformer IV-1 ]

|    |           |           |           |
|----|-----------|-----------|-----------|
| O  | 0.586622  | 1.797695  | 0.914023  |
| O  | -1.850161 | -0.390818 | 0.914023  |
| O  | 1.263539  | -1.406878 | 0.914023  |
| O  | 0.000000  | 0.000000  | 2.725386  |
| H  | 0.451789  | 1.226825  | 1.724496  |
| H  | -0.231958 | 1.610441  | 0.446687  |
| H  | -1.288356 | -0.222151 | 1.724496  |
| H  | -1.278704 | -1.006102 | 0.446687  |
| H  | 0.836567  | -1.004673 | 1.724496  |
| H  | 1.510662  | -0.604339 | 0.446687  |
| H  | 0.000000  | 0.000000  | 3.682727  |
| Ar | 0.000000  | 0.000000  | -2.236878 |

[ Conformer IV-2 ]

|   |           |           |          |
|---|-----------|-----------|----------|
| O | 0.498055  | 1.768967  | 0.935540 |
| O | -1.803272 | -0.608243 | 1.166481 |
| O | 1.349479  | -1.399385 | 1.107935 |
| O | 0.081595  | 0.051361  | 2.869447 |
| H | 0.416619  | 1.232236  | 1.776894 |

|    |           |           |          |
|----|-----------|-----------|----------|
| H  | -0.313728 | 1.507246  | 0.493347 |
| H  | -1.235299 | -0.332180 | 1.939524 |
| H  | -1.178668 | -1.171761 | 0.701216 |
| H  | 0.935692  | -0.953764 | 1.904209 |
| H  | 1.546305  | -0.626232 | 0.572089 |
| H  | 0.144450  | 0.139375  | 3.820693 |
| Ar | -0.441228 | -3.499048 | 3.065111 |

[ Conformer I-1 ] Counterpoise optimization

|                |           |           |           |
|----------------|-----------|-----------|-----------|
| O(Fragment=1)  | -2.154113 | 1.242107  | -0.678238 |
| O(Fragment=2)  | 2.152759  | 1.244467  | -0.678249 |
| O(Fragment=3)  | 0.001357  | -2.486573 | -0.678243 |
| O(Fragment=4)  | 0.000002  | 0.000000  | -1.574268 |
| H(Fragment=1)  | -1.360148 | 0.746800  | -1.050964 |
| H(Fragment=1)  | -1.736220 | 1.984172  | -0.239852 |
| H(Fragment=2)  | 1.326829  | 0.804524  | -1.050975 |
| H(Fragment=2)  | 2.586451  | 0.511535  | -0.239843 |
| H(Fragment=3)  | 0.033325  | -1.551326 | -1.050969 |
| H(Fragment=3)  | -0.850231 | -2.495695 | -0.239846 |
| H(Fragment=4)  | -0.000003 | -0.000003 | -2.533283 |
| Ar(Fragment=5) | -0.000008 | -0.000009 | 2.084392  |
